# Supplementary material for: Starvation causes female-to-male sex reversal through lipid metabolism in the teleost fish, medaka (Olyzias latipes)
Source: PubMed Central journal article supplement (PMC7132775; doi:10.1242/bio.050054), 2020-04-03
Supplement: biolopen-9-050054-s1.pdf [file biolopen-9-050054-s1.pdf]

# Supplementary Figures

## Figure S1

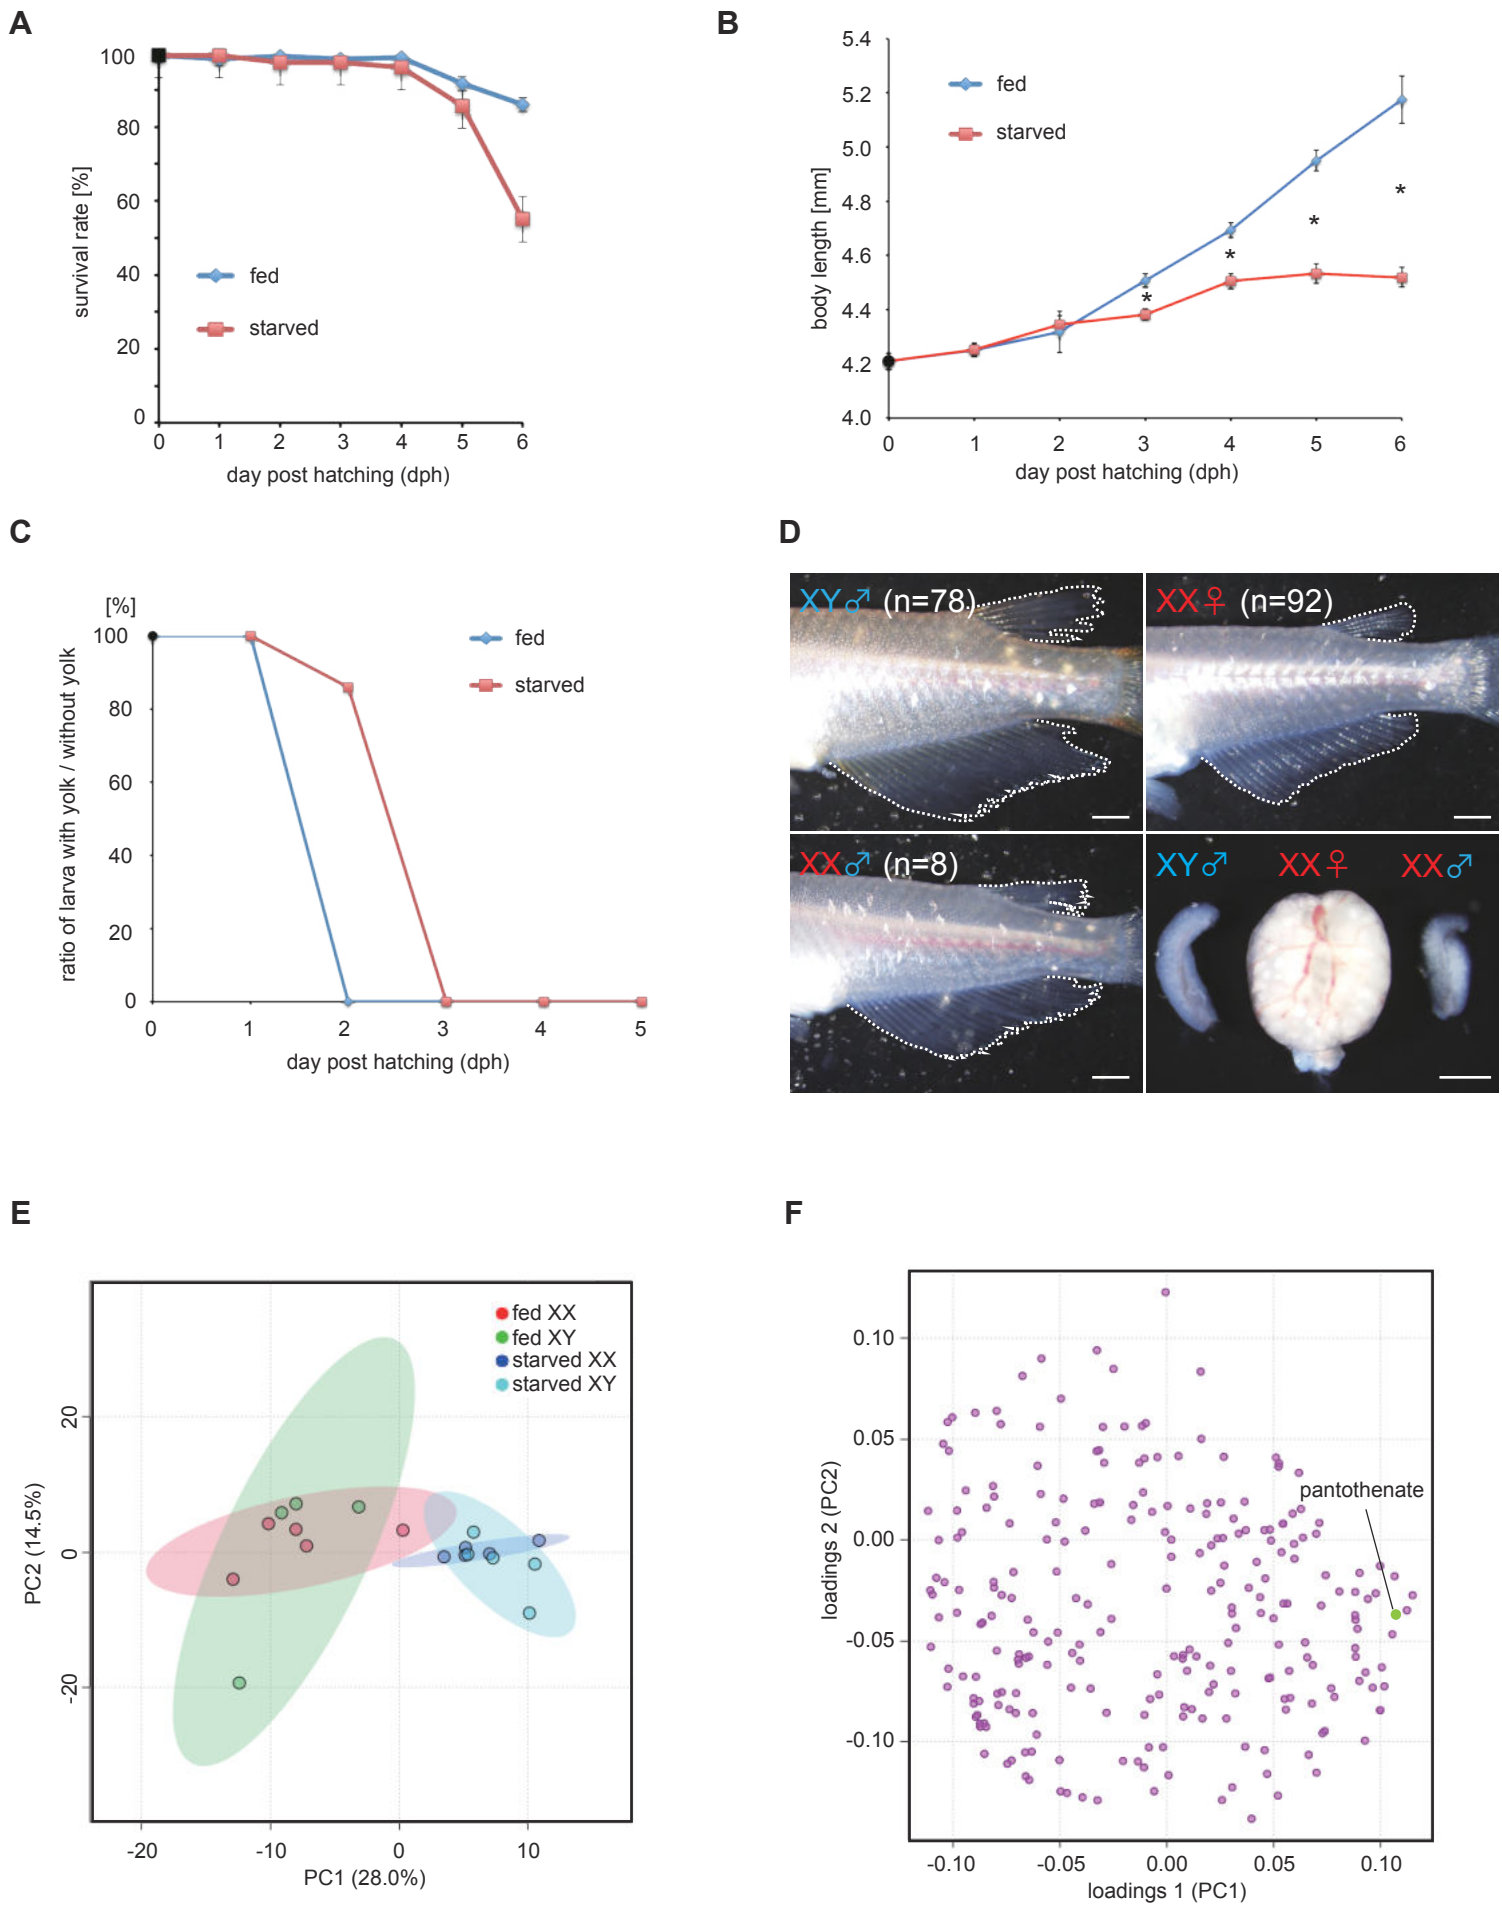

**Figure S1. Starvation effects on medaka larvae.**

(A) The survival rate during starvation treatment from 0–6 dph (0 dph  $n = 145$ , 1 dph fed  $n = 130$ , 1 dph starved  $n = 143$ , 2 dph fed  $n = 141$ , 2 dph starved  $n = 128$ , 3 dph fed  $n = 144$ , 3 dph starved  $n = 134$ , 4 dph fed  $n = 147$ , 4 dph starved  $n = 137$ , 5 dph fed  $n = 135$ , 5 dph starved  $n = 130$ , 6 dph fed  $n = 144$ , 6 dph starved  $n = 144$ ). dph, day post hatching. The values indicate the average and the bars indicate s.e.m..

(B) Body length during starvation treatment from 0–6 dph. A significant difference appears at 3 dph (0 dph  $n = 45$ , 1 dph fed  $n = 30$ , 1 dph starved  $n = 43$ , 2 dph fed  $n = 41$ , 2 dph starved  $n = 28$ , 3 dph fed  $n = 44$ , 3 dph starved  $n = 34$ , 4 dph fed  $n = 47$ , 4 dph starved  $n = 37$ , 5 dph fed  $n = 35$ , 5 dph starved  $n = 30$ ). The values indicate the average and the bars indicate s.e.m.. Student's t-test was used as statistical analysis. \* $P$ -value  $< 0.05$ .

(C) The presence of the yolk ball during starvation treatment from 0–5 dph. The yolk ball disappears until 2 dph under normal feeding conditions (0 dph  $n = 148$ , 1 dph fed  $n = 150$ , 1 dph starved  $n = 150$ , 2 dph fed  $n = 151$ , 2 dph starved  $n = 145$ , 3 dph fed  $n = 151$ , 3 dph starved  $n = 149$ , 4 dph fed  $n = 151$ , 4 dph starved  $n = 147$ , 5 dph fed  $n = 146$ , 5 dph starved  $n = 150$ ). The values indicate the average.

(D) The appearance of dorsal and anal fins and gonads in the medaka d-rR strain. Sex-reversed individual indicates a male type of dorsal and anal fins with normal testis. The genotyping result is shown in Table 1. Scale bars: 1 mm.

(E) Principal component analysis based on metabolomic analysis (IC-FTMS and LC-MS/MS, 250 metabolites). Both XX and XY show different metabolic profiles depending on feeding conditions (fed XX  $n = 5$ , fed XY  $n = 4$ , starved XX  $n = 5$ , starved XY  $n = 5$ ). Principal component, PC

(F) Loading plot of principal component analysis. A point indicates metabolite. Pantothenate shows a high contribution to the positive side of principal component 1. Principal component, PC

## Figure S2

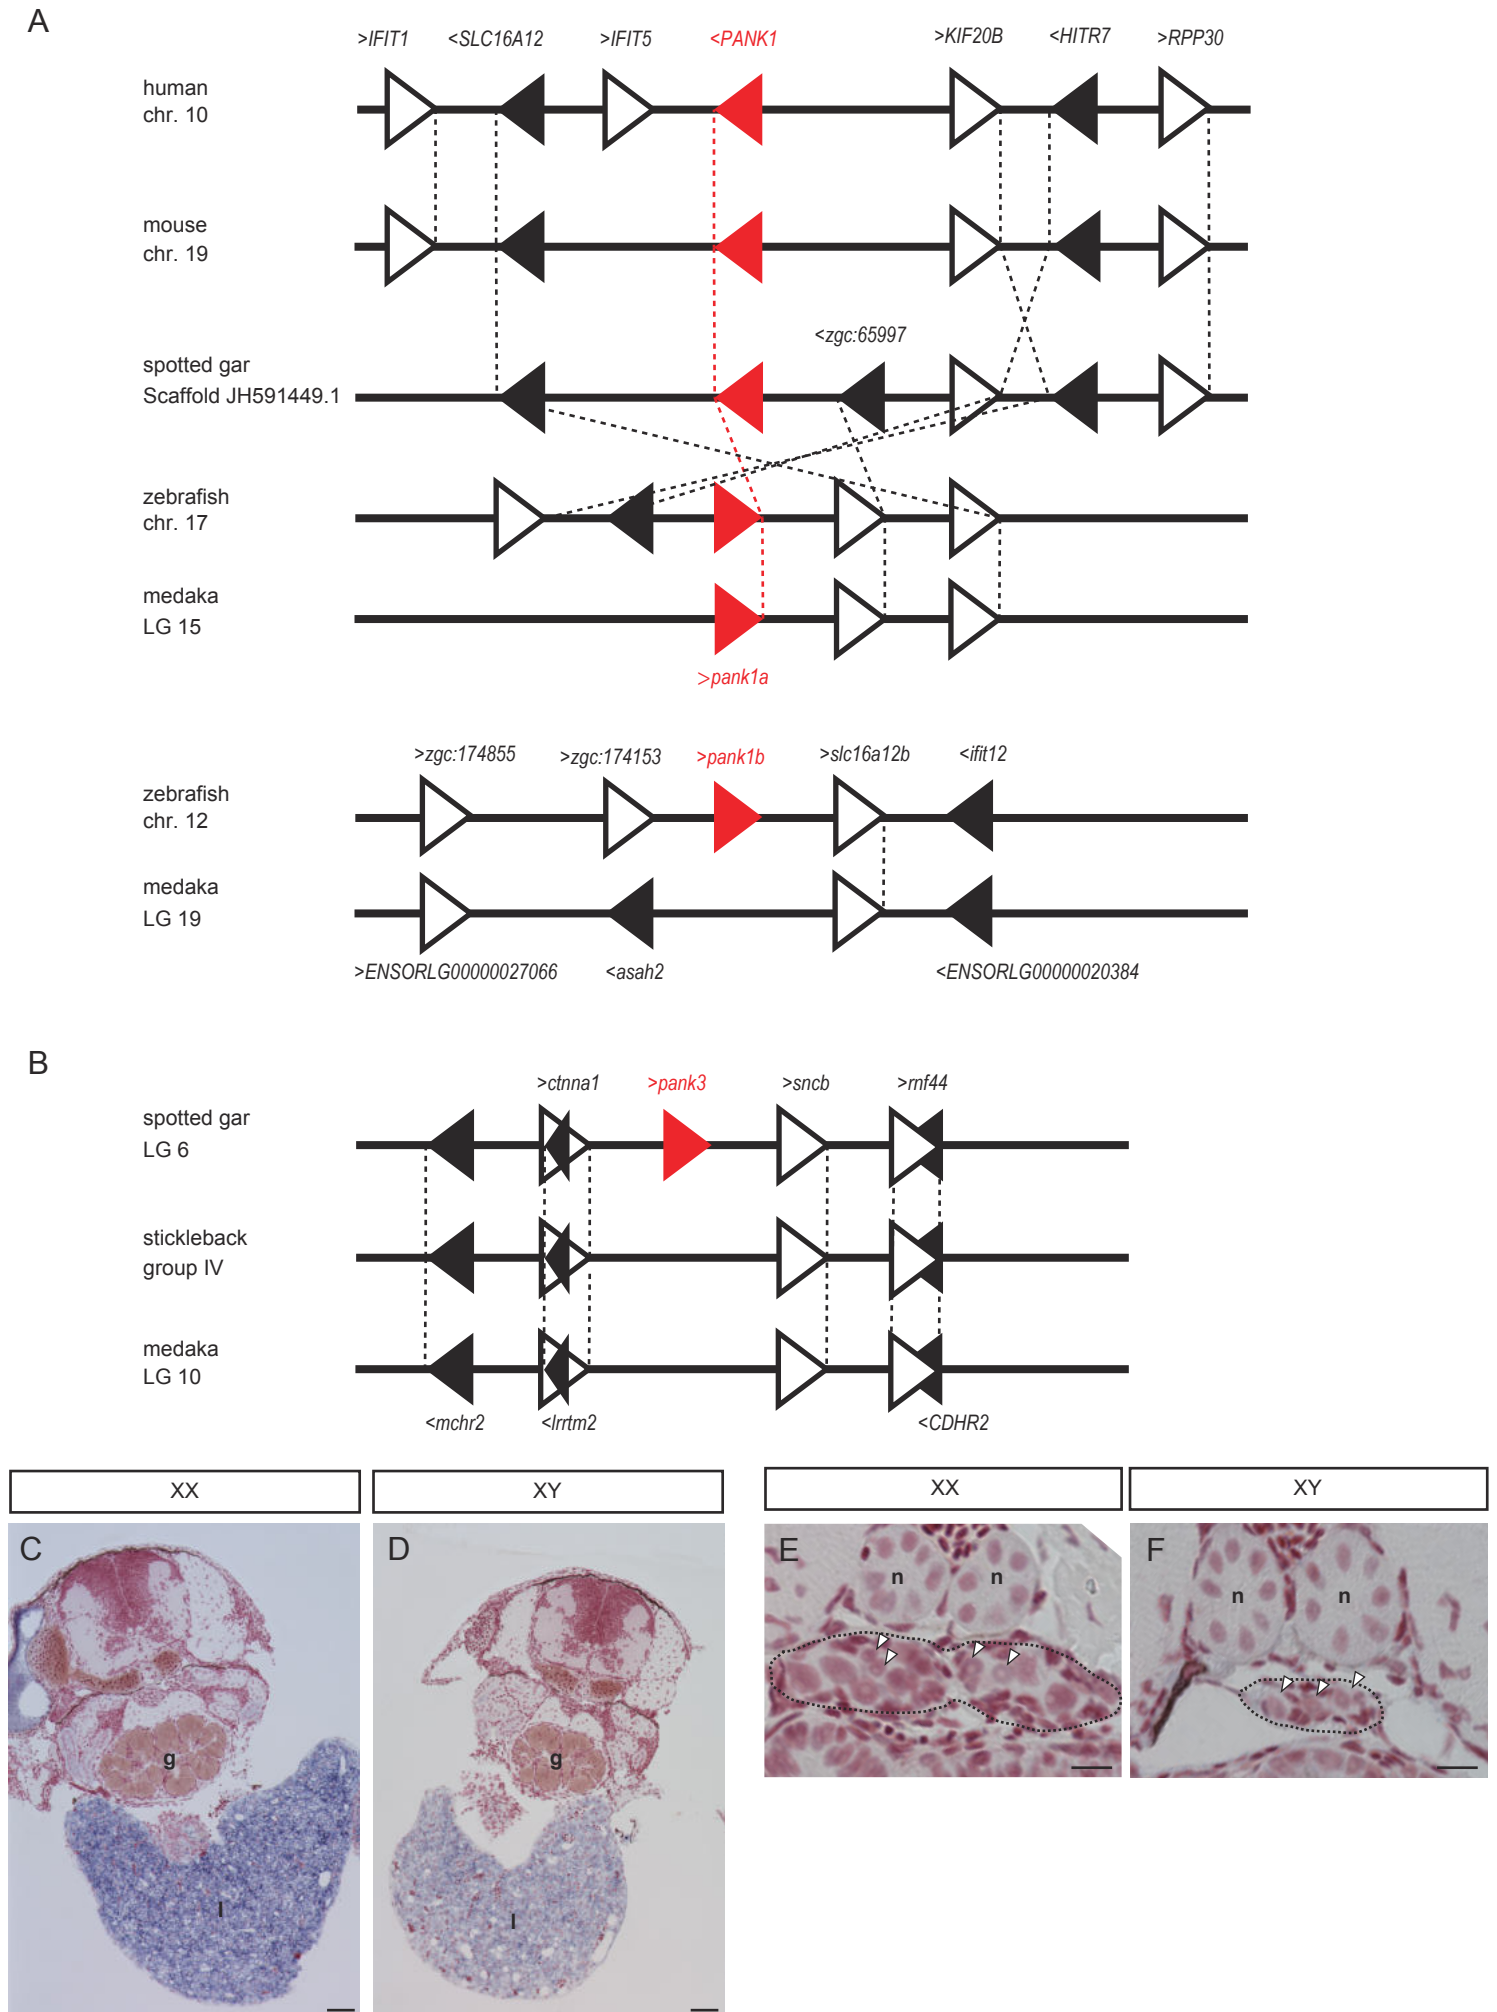

**Figure S2. Analysis of medaka *pank* genes.**

(A) Synteny analysis for *pank1* gene. *pank1b* is not found in the syntenic region in the medaka LG19.

(B) Synteny analysis for *pank3* gene. *pank3* is not found in the syntenic region in the medaka LG10.

(C-F) *pank1a* expression was examined by whole mount *in situ* hybridization at 5 dph. Strong signals are detected in the gut and liver of both sexes (C, D). *pank1a* transcripts are not detected in the gonad (E, F). Black dashed lines indicate the outlines of the gonads. White arrowheads indicate germ cells with negative signals. g, gut; l, liver; n, nephric duct. Scale bars: 40  $\mu\text{m}$  (C, D), 10  $\mu\text{m}$  (E, F).

# Figure S3

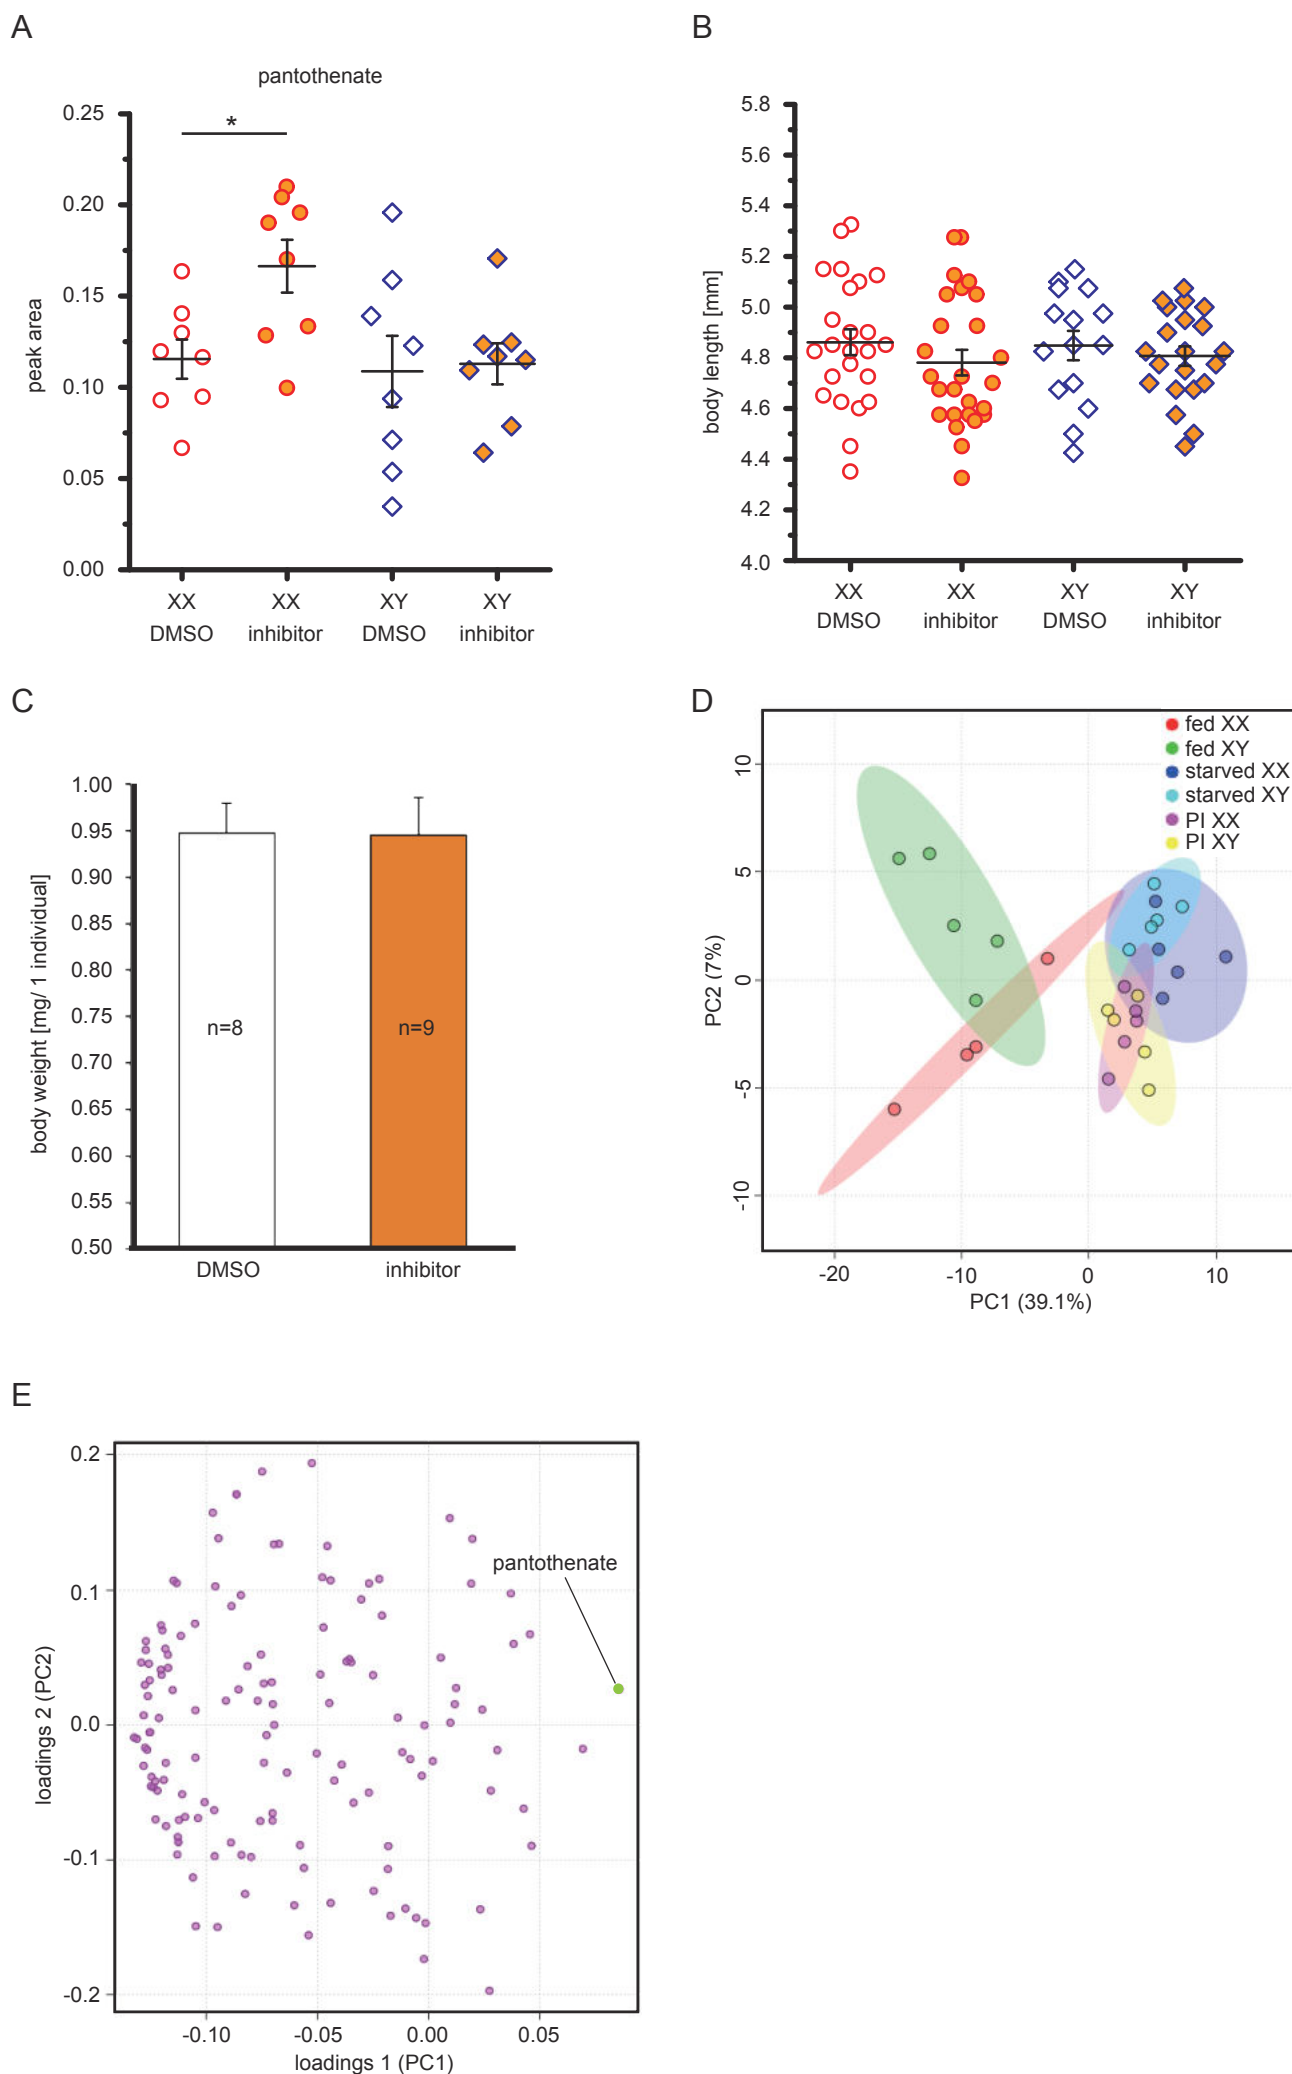

**Figure S3. Pank inhibitor treatment does not affect larval growth but causes pantothenate accumulation.**

(A) The amount of pantothenate after 5 days of Pank inhibitor treatment. XX larvae treated with Pank inhibitor indicate the increase of pantothenate (XX DMSO  $n = 8$ , XX inhibitor  $n = 8$ , XY DMSO  $n = 8$ , XY inhibitor  $n = 8$ ). The vertical axis indicates the peak area of pantothenate in the spectrogram of IC-FTMS analysis. The values indicate the average and the bars indicate s.e.m.. A two-way ANOVA followed by Dunnett test was used as statistical analysis. \*:  $P$ -value  $< 0.05$  in Dunnett test.

(B) Body length at 5 dph under Pank inhibitor (50  $\mu$ M) treatment. Treated larvae show normal body length (XX DMSO  $n = 24$ , XX inhibitor  $n = 26$ , XY DMSO  $n = 15$ , XY inhibitor  $n = 21$ ). The values indicate the average and the bars indicate s.e.m.. A two-way ANOVA followed by Dunnett test was used as statistical analysis.

(C) Body weight after 5 days of Pank inhibitor treatment. The weight of a single larva was calculated from the results of measurement using 4-6 larvae. (DMSO = 8 times, inhibitor = 9 times). Larvae treated with Pank inhibitor show normal body weight. The values indicate the average and the bars indicate s.e.m.. Student's  $t$ -test was used as statistical analysis.

(D) Principal component analysis based on metabolomic analysis (IC-FTMS, 141 metabolites). Pank inhibitor (PI, 50  $\mu$ M)-treated larvae show a starved-like metabolic profile (fed XX  $n = 4$ , fed XY  $n = 5$ , starved XX  $n = 5$ , starved XY  $n = 5$ , PI XX  $n = 5$ , PI XY  $n = 5$ ). One dot indicates a data set of a single larva.

(E) Loading plot of principal component analysis. A point indicates metabolite. Pantothenate shows a high contribution to the positive side of principal component 1. Principal component, PC

# Figure S4

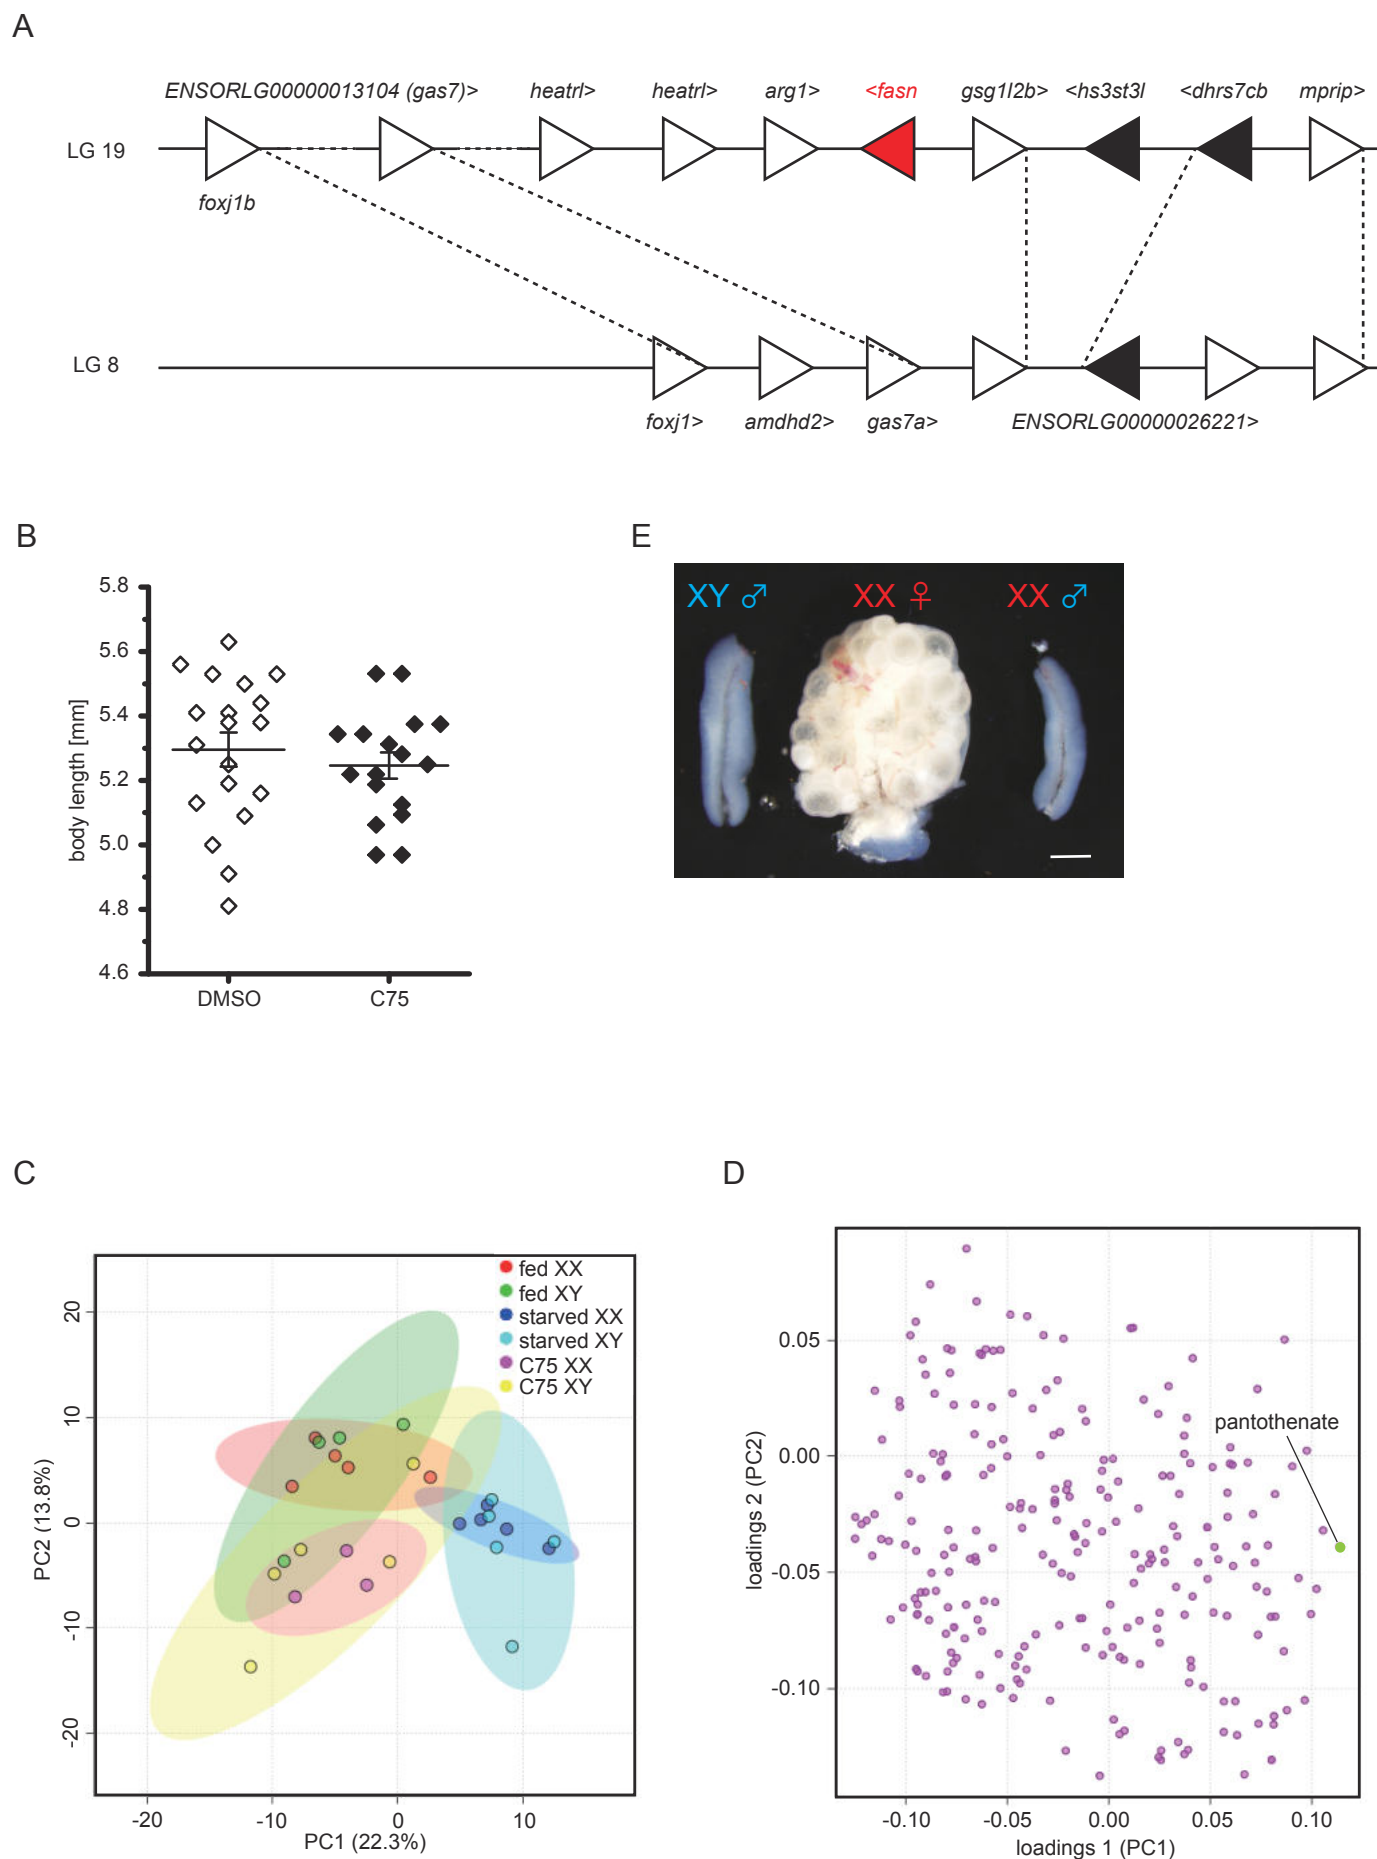

**Figure S4. The effects of C75 (FAS inhibitor) treatment.**

(A) Synteny analysis for *fasn* gene on medaka genome. The paralogue for *fasn* is not found on the medaka LG8.

(B) Body length at 5 dph under C75 treatment (20  $\mu\text{g}/\text{mL}$ ). Treated larvae show normal body length (DMSO  $n = 19$ , C75  $n = 17$ ). The values indicate the average and the bars indicate s.e.m.. Student's t-test was used as statistical analysis.

(C) Principal component analysis based on metabolic analysis (ICFTMS, LC-MS/MS, 250 metabolites). C75 (20  $\mu\text{g}/\text{mL}$ )-treated larvae do not show a starved-like metabolic profile (fed XX  $n = 5$ , fed XY  $n = 4$ , starved XX  $n = 5$ , starved XY  $n = 5$ , C75 XX  $n = 3$ , C75 XY  $n = 5$ ).

(D) Loading plot of principal component analysis. A point indicates metabolite. Pantothenate shows a high contribution to the positive side of principal component 1. Principal component, PC

(E) Gonad from C75-treated fish (most right). Sex-reversed individuals have normal testis. Scale bars: 1 mm.



## Figure S5

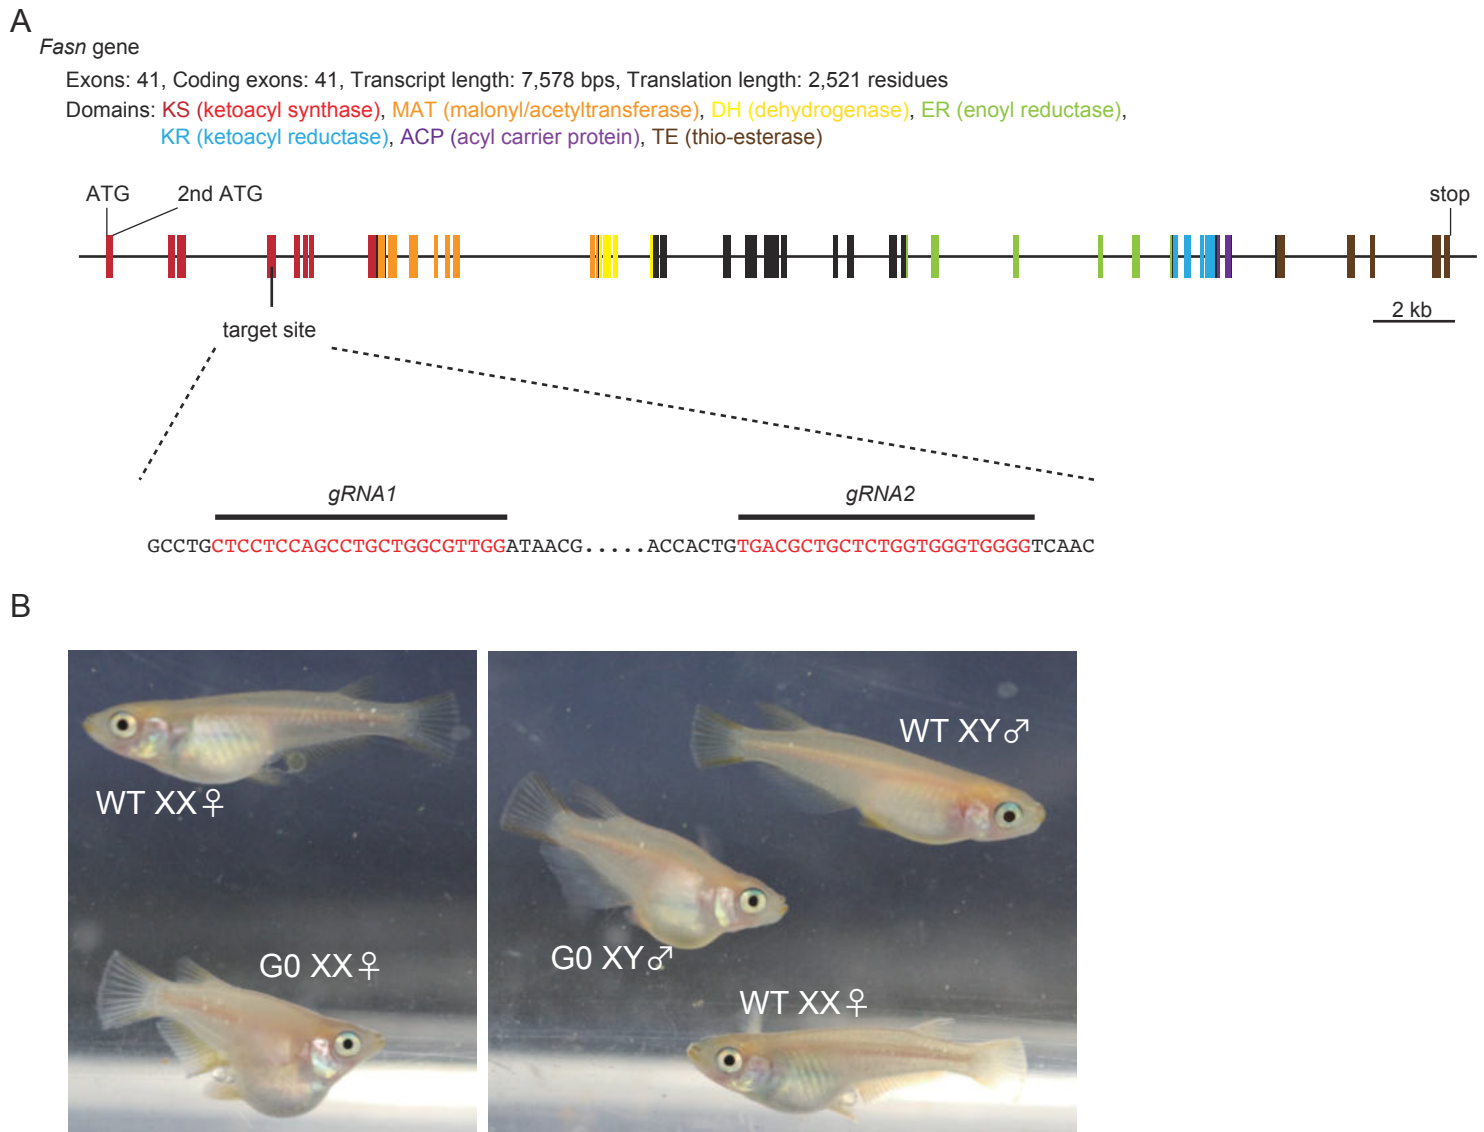

**Figure S5. *fasn* disruption by CRISPR/Cas9 system.**

(A) Design of gRNAs for disruption of *fasn* gene. The two different gRNAs were designed based on exon 4 of the *fasn* gene.

(B) The body appearance of G0 adult medaka. The G0 adult medaka show a short body length with a swollen belly.

# Figure S6

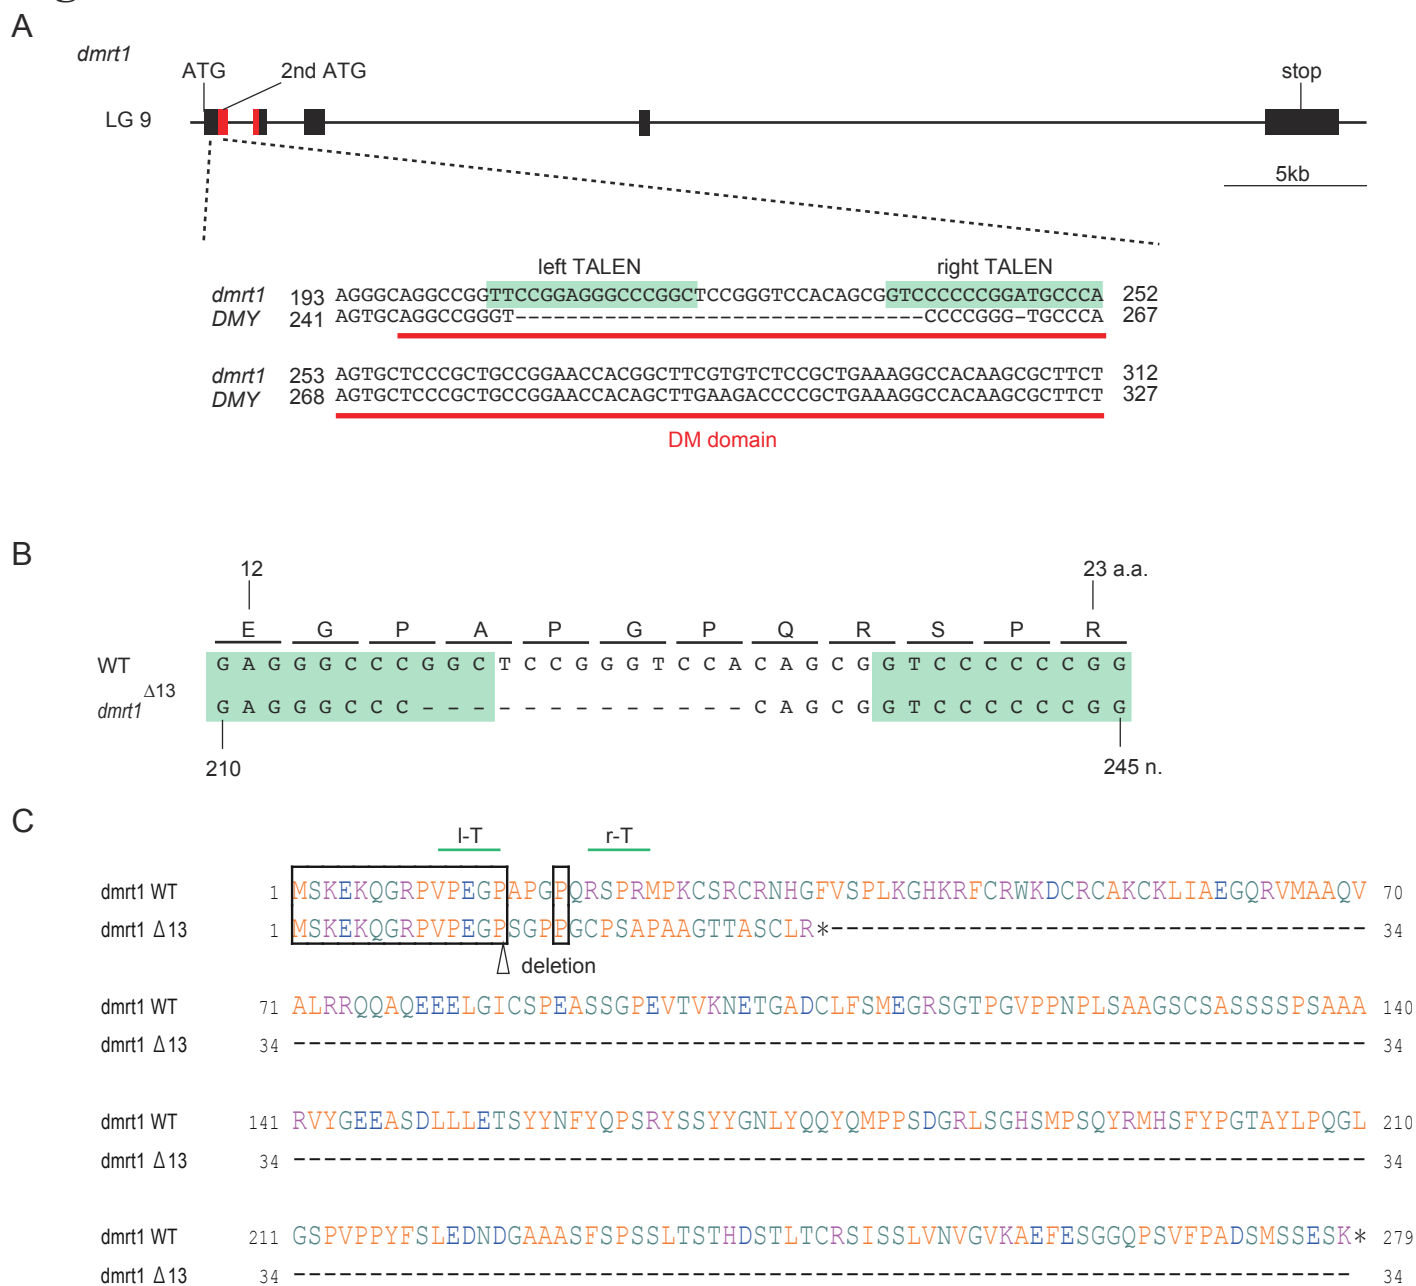

**Figure S6. Design of TALEN for *dmrt1* disruption.**

(A) The location of left and right TALEN arms on the *dmrt1* gene. TALEN was designed based on exon 1 of the *dmrt1* gene.

(B) The sequence of *dmrt1* in Δ13 line.

(C) The expected amino acid sequence of *dmrt1* in Δ13 line. \*: stop codon.

**Table S1. Primers and TaqMan probes used in this study.**

| Experiment            | primer name               | sequence (5'-3')                                                                 |
|-----------------------|---------------------------|----------------------------------------------------------------------------------|
| genotyping            | tq-dmy-F                  | CGGTAAAATTGACGCACAGCAT                                                           |
|                       | tq-dmy-R                  | GGTGATTACTTGTGTTTCCACATTT                                                        |
|                       | dmy-FAM (TaqMan probe)    | TGGCTTACCGTTGGA                                                                  |
|                       | tq-cyp19a-F               | TGGCACAGCCAGCAACTATTA                                                            |
|                       | tq-cyp19a-R               | TCCGTTGATCCACACTCGAA                                                             |
|                       | cyp19a-VIC (TaqMan probe) | ACAACAAATATGGAGACTT                                                              |
|                       | dmrt1-typing-F1           | TCCTGTACAAGTGACCCCGC                                                             |
|                       | dmrt1-typing-R1           | TTCAGCGGAGACACGAAGCC                                                             |
| In situ hybridization | fasn probe F              | TGGAGATCGGGAAGTACGAC                                                             |
|                       | fasn probe R              | GGCCAGTGAATTGTAATACGACTCACTATAGGGAAGTGGTCCAACACCTCCAG                            |
|                       | pank1a probe F            | CGTCCACTTGGAGCTGAGAA                                                             |
|                       | pank1a probe R            | GGCCAGTGAATTGTAATACGACTCACTATAGGGTCACGAGTCATCTGTTGTC                             |
| fasn KO               | fasn gRNA1 F              | TAATACGACTCACTATAGGCCTCCAGCCTGCTGGCGT                                            |
|                       | fasn gRNA1 R              | TTCTAGCTCTAAAACACGCCAGCAGGCTGGAGG                                                |
|                       | fasn gRNA2 F              | TAATACGACTCACTATAGGACGCTGCTCTGGTGGGTG                                            |
|                       | fasn gRNA2 R              | TTCTAGCTCTAAAACACCCACCAGAGCAGCGT                                                 |
|                       | 80nt-crRNA-F              | GTTTTAGAGCTAGAAATAGCAAGTTAAATAAAGGCTAGTCCGTTATCAACTTGAAAAAGTGGCACCCAGTCCGGTCTTTT |
|                       | 80nt-crRNA-R              | AAAAGCACCGACTCGGTGCCATTTTTCAAGTTGATAACGGACTAGCCTATTTTAACTTGCTATTCTAGCTCTAAAAC    |
|                       | T7-F                      | TAATACGACTCACTATAG                                                               |
|                       | crRNA-R                   | AAAAGCACCGACTCGGTG                                                               |
|                       | fasn check F              | CCAGAGGAACGGTTGTTTTTC                                                            |
|                       | fasn check R              | TGAGCATGCCCAAGTTTCAT                                                             |
| RT-qPCR               | b-actin F                 | TGGCGCTTGACTCAGGATTT                                                             |
|                       | b-actin R                 | GCAGATGCCTGGGGTGTTTA                                                             |
|                       | cyp19a1a F                | CGCACAGAGTTCTTCCACAAAAG                                                          |
|                       | cyp19a1a R                | AACGGCTGAAAATAACGACGA                                                            |
|                       | foxl2 F                   | CACGCTGTCTGGCATCTACC                                                             |
|                       | foxl2 R                   | TCGTTGAGGCTCAGGTTGTG                                                             |
|                       | dmrt1 F                   | AGGGCCCGGCTCCGGCTCCA                                                             |
|                       | dmrt1 R                   | TTCAGCGGAGACACGAAGCC                                                             |
|                       | gsdf F                    | TCCATGGCCACCGAGGTCTT                                                             |
|                       | gsdf R                    | CCGAGGAATTGCAGAGAGCAC                                                            |
|                       | pank1a F                  | GCTTTGGAAATGGCCAGTAA                                                             |
|                       | pank1a R                  | CATGTGACCAAAGCTGGATG                                                             |
|                       | pank2 F                   | CACCCTCTCCATGAAGCTGT                                                             |
|                       | pank2 R                   | GATGCAGCAACTCAAGCAAG                                                             |
|                       | pank4 F                   | TCACCGTCAGGAGTCTGTTG                                                             |
|                       | pank4 R                   | TCGTTCTCCCTCTGCTTGAT                                                             |
